# Supplementary material for: Gene-Gene and Gene-Environment Interactions in Meta-Analysis of Genetic Association Studies
Source: PLoS One. 2015 Apr 29;10(4):e0124967. doi: 10.1371/journal.pone.0124967 (PMC4414456; doi:10.1371/journal.pone.0124967)
Supplement: S3 Text — (DOCX) [file pone.0124967.s003.docx]

**Details of the derivation of Equation 2.1-6:**

The *b*0 is considered to be the log(ORwomen), and *b*1 is considered the logarithmic moderator effect of gender [log(ORmen) − log(ORwomen)]. The *y*i is logarithmic empirical combined OR from each study [log(*ORcombine*)].

The detailed of the derivation was shown as follows:
